# Supplementary material
Source: PubMed Central journal article supplement (PMC4256720)
Supplement: NIHMS637453-supplement-1.pdf [file NIHMS637453-supplement-1.pdf]

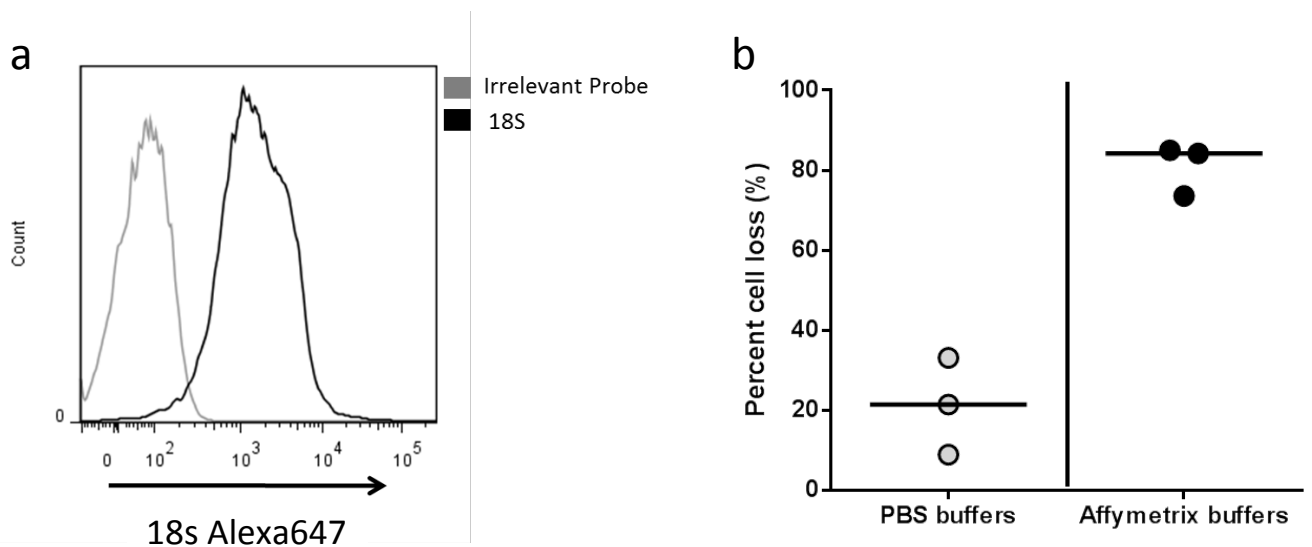

**Supplementary Figure 1. Adaptation of the QuantiGene ViewRNA for cells in suspension and detection with flow cytometry. (a)** PBMCs from healthy control individuals were stained either with probes for 18s or and irrelevant probe, DapB, according to the QuantiGene ViewRNA protocol for microscopy. Instead of performing the assay on slides we performed the assay on cells in suspension in 3ml facs tubes and the cells we analyzed on the LSR Fortessa. **(b)** Comparison of cell loss after using either PBS, according to a standard surface stain flow protocol, or the flow-FISH buffers.

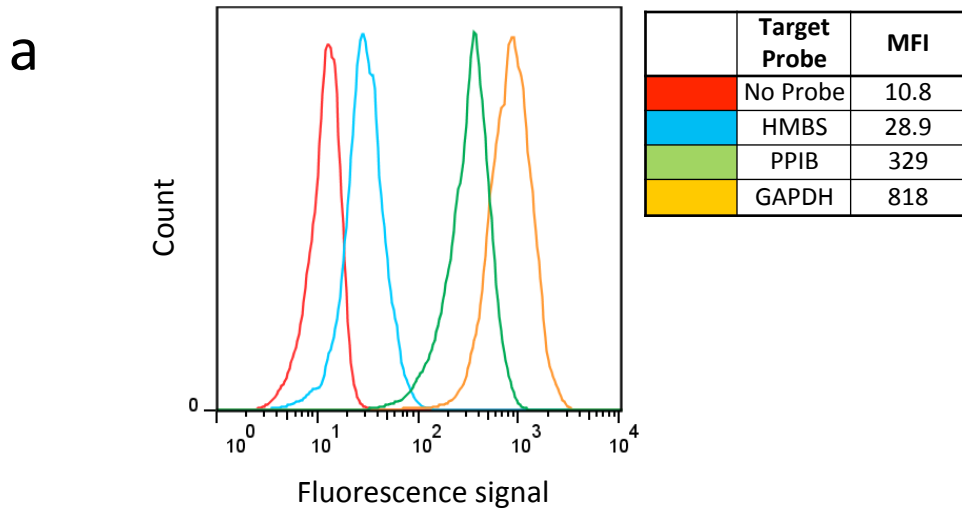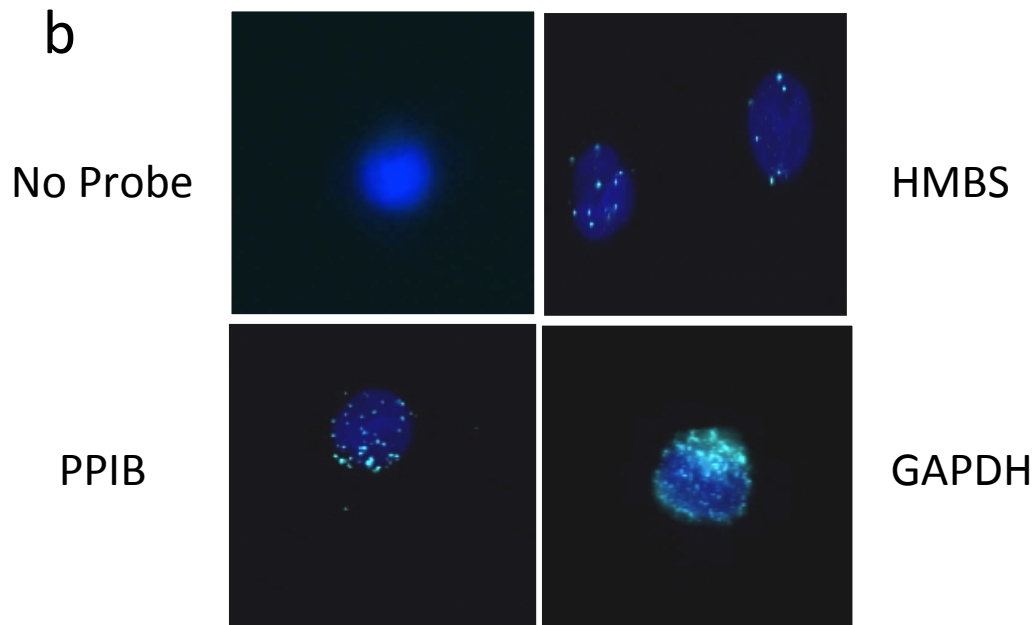

**Supplementary Figure 2. Sensitivity of Flow-FISH assay.**

Detection of three housekeeping genes with variable expression with flow cytometry and confocal microscopy. U937 cells were stained using the Flow-FISH assay with probes for HMBS (low expression), PPIB (medium expression) and GABDH (high expression). Samples were split in two and half were analyzed with flow cytometry (a) and the other half was analyzed with confocal microscopy (b).

a

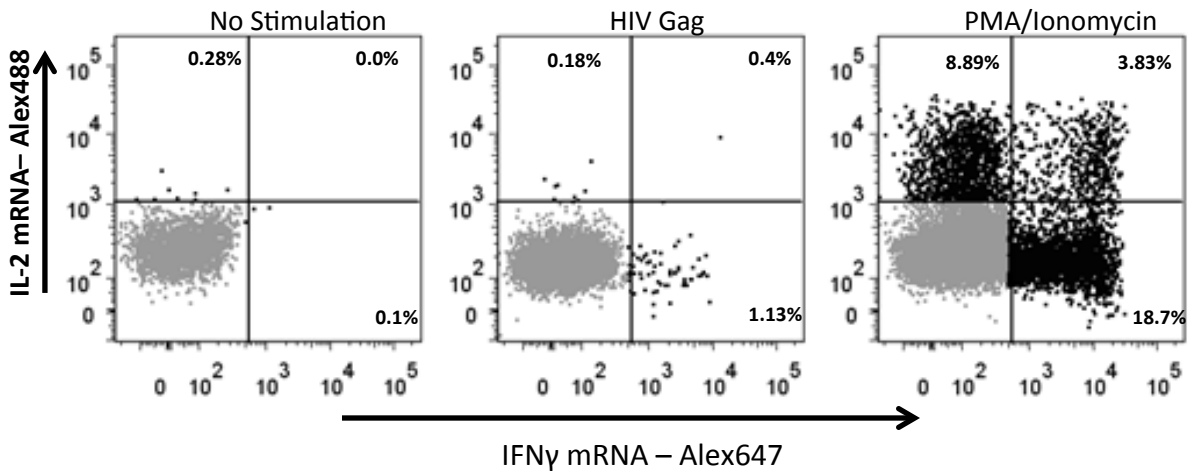

b

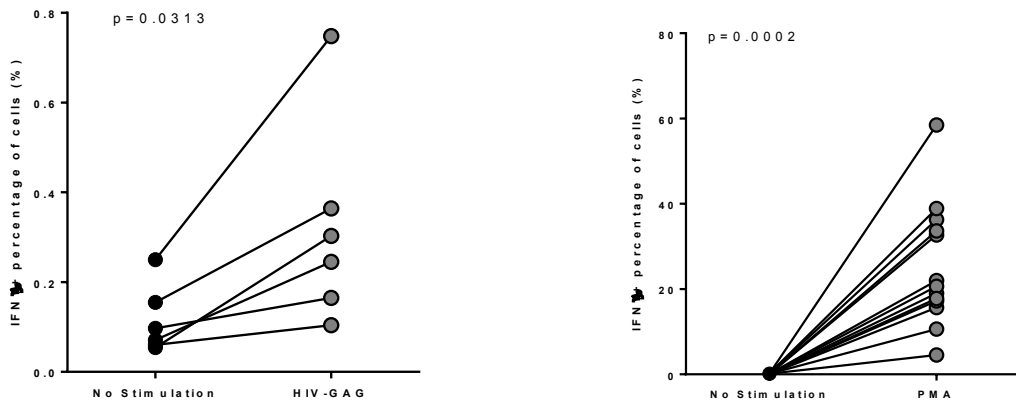

**Supplementary Figure 3. Detection of IL-2 and IFN- $\gamma$  mRNA in antigen-specific CD8 T cells.** IL-2 and IFN- $\gamma$  mRNA detection in CD8 T cells from PBMCs of an HIV-infected individual stimulated with an HIV-Gag peptide pool, a CMV lysate or PMA/Ionomycin for 12 hours (one representative experiment out of five). **(b)** Collective data of IFN- $\gamma$  mRNA detection after HIV-Gag peptide pool, a CMV lysate or PMA/Ionomycin stimulation. Statistical analysis was performed using a Wilcoxon matched-pairs test.

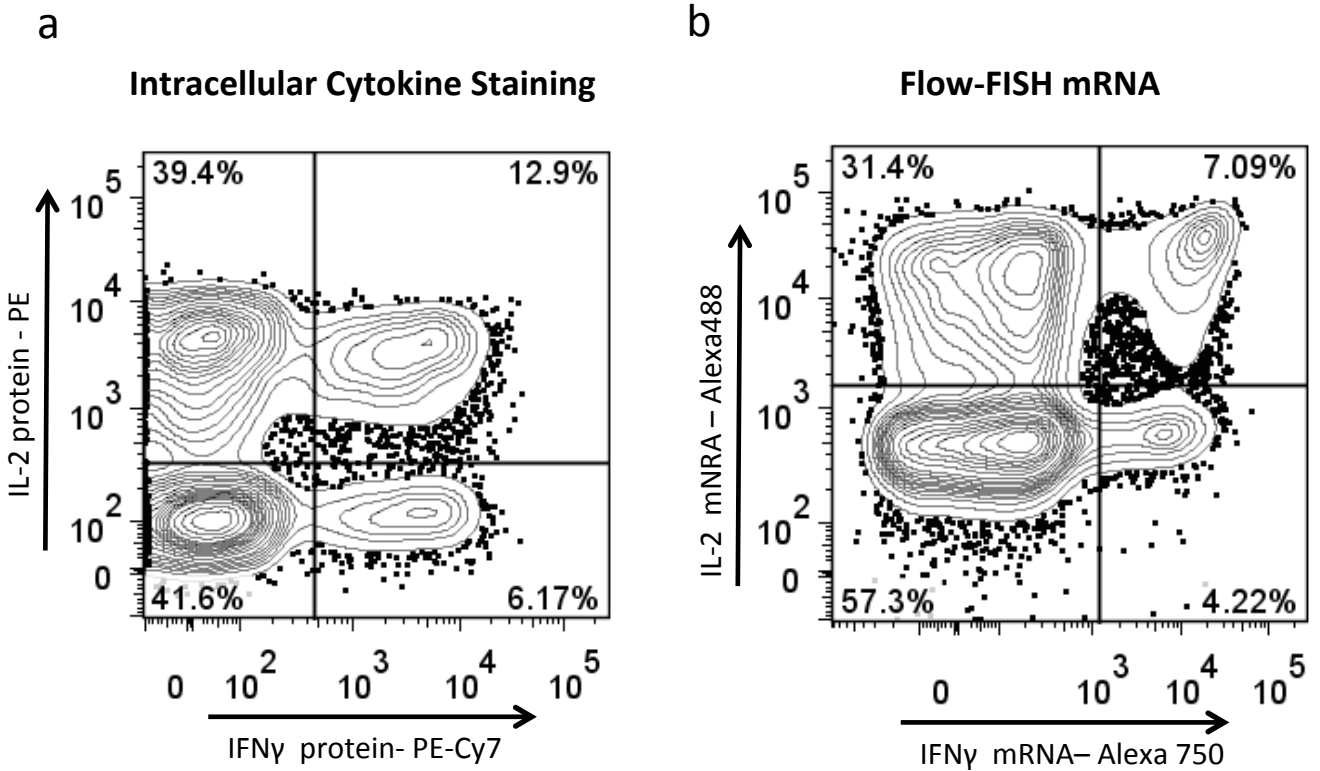

**Supplementary Figure 4. Comparison of cytokine detection with intracellular cytokine staining protocol or flow-FISH mRNA assay.** PBMCs from healthy control individuals were stimulated overnight with PMA/Inomycin. A) intracellular cytokine staining for IL-2 and IFN $\gamma$  protein and B) Flow-FISH assay for detection of IL-2 and IFN $\gamma$  mRNA.

**Subject 1**

**Subject 2**

No Stimulation

PMA/Ionomycin

No Stimulation

PMA/Ionomycin

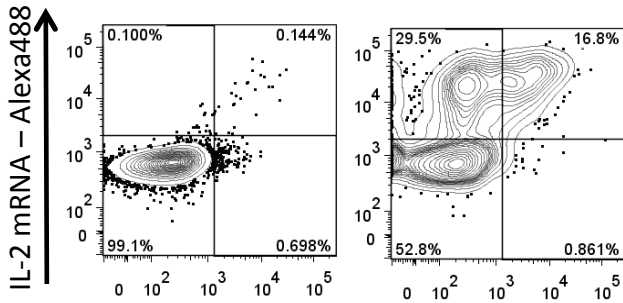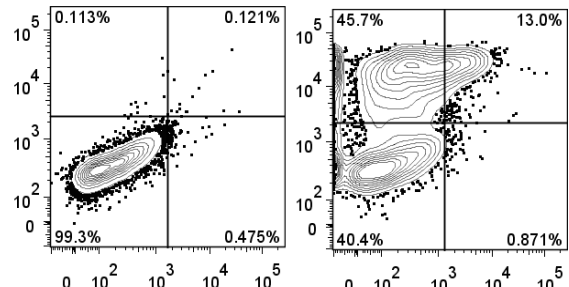

**CD4 T cells**

IL-21 mRNA - Alexa647

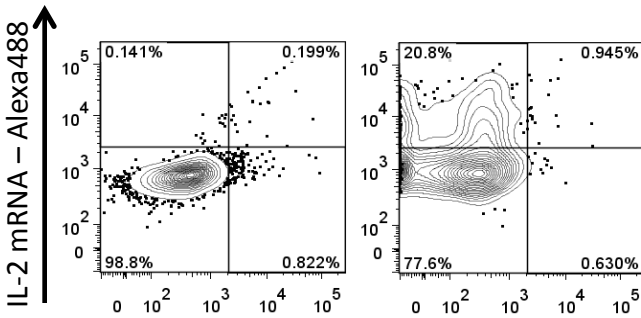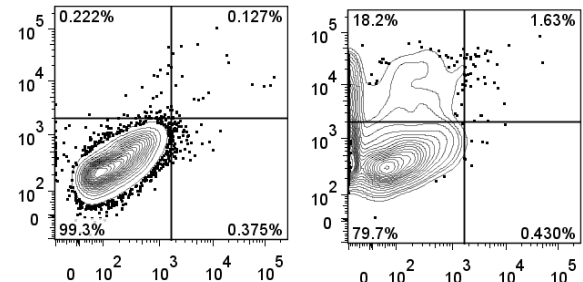

**CD8 T cells**

IL-21 mRNA - Alexa647

**Supplementary Figure 5. Detection of IL-21 mRNA in CD4 T cells but not CD8 T cells.** Lymphocytes isolated by a spleen sample of two subjects suffering from idiopathic thrombocytopenic purpura. Cells were stimulated overnight either following an ICS protocol or following the new flow-RNA protocol.

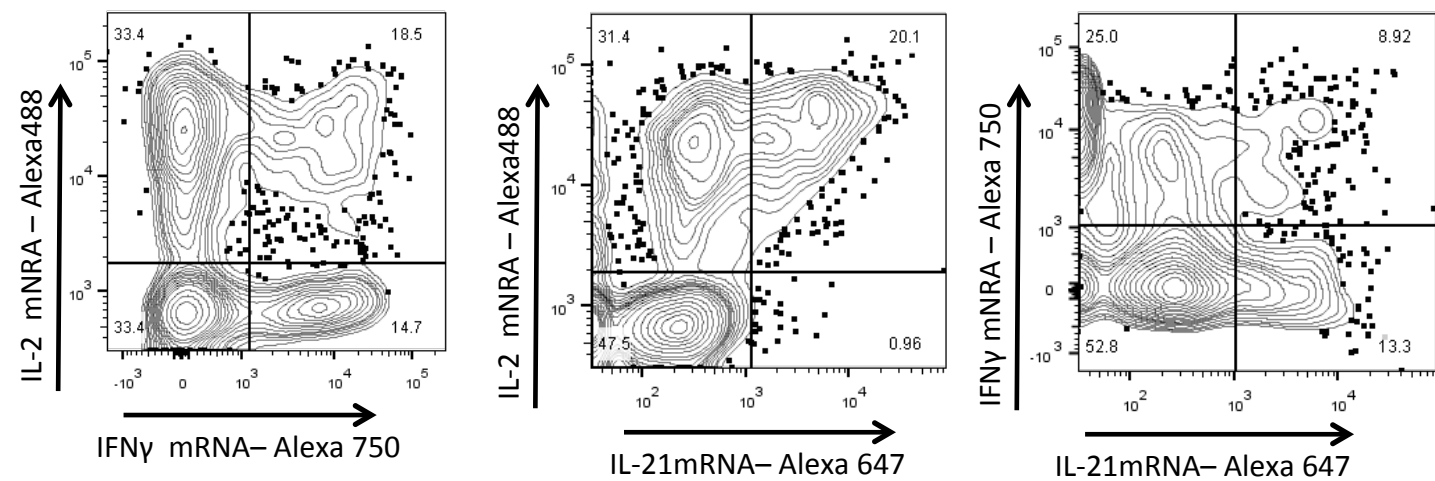

**Supplementary Figure 6. Simultaneous detection of 3 different mRNA cytokines using flow-RNA fish. IL2, IFN $\gamma$  and IL-21 mRNA detection on CD4 T cells from a spleen sample of a subject suffering from idiopathic thrombocytopenic purpura. Cells were stimulated overnight with PMA/Ionomycin.**

**Supplementary Table 1. Sequence of probe sets used in this study.**

| TARGET GENE (ACCESSION NUMBER) | PROBE BINDING REGION      | SEQUENCE                     |
|--------------------------------|---------------------------|------------------------------|
| Human IL-2 (NM_021803)         | 2-24bp                    | ccttggctctcgtttcacttcag      |
|                                | 25-52bp                   | ttcataagtaccaacagtagagctaga  |
|                                | 53-72bp                   | tccatgttgccaggactgga         |
|                                | 73-96bp                   | accatcagacagatgacaatcctc     |
|                                | 97-118bp                  | gaccagtgtccccaagaagatg       |
|                                | 119-139bp                 | acctgggagcttgattgtg          |
|                                | 140-162bp                 | attctaatacatgtggcgatctg      |
|                                | 163-189bp                 | tgatcaacaatatctataagttgacgc  |
|                                | 190-214bp                 | caagtcattcacataattttcagc     |
|                                | 215-234bp                 | gctggcagaaattcaggac          |
|                                | 235-260bp                 | cacagttgtctctacatcttctgga    |
|                                | 261-282bp                 | aagcaggaaaaagctgaccact       |
|                                | 283-304bp                 | tgactttagttgggccttctga       |
|                                | 305-328bp                 | ccttcattgttctctgatttgc       |
|                                | 329-356bp                 | tcagcttttaattgatacattgattat  |
|                                | 357-378bp                 | tttgtggaaggtggttctctc        |
|                                | 379-400bp                 | gtgttctgtctctccctgca         |
|                                | 401-423bp                 | tcacatgaaggcatgtagtct        |
|                                | 424-446bp                 | tgggtggtttttctcataagaa       |
|                                | 447-473bp                 | gtgattgaatctttctaggaattctt   |
| 474-497bp                      | gctgatgaatcatctttggagaa   |                              |
| 498-521bp                      | ttcctgtgttctagaggacagat   |                              |
| 522-547bp                      | caagtagatcctcaggaatctcac  |                              |
| Human IL-21 (NM_000586)        | 2-28bp                    | tagtgattaagagagtgatagggaaac  |
|                                | 29-52bp                   | ggcaggagttgaggttactgtgag     |
|                                | 53-76bp                   | caggagttgcatcctgtacattgt     |
|                                | 77-99bp                   | gcaagacttagtgcaatgcaaga      |
|                                | 100-124bp                 | agtaggtgcactgtttgtgacaagt    |
|                                | 125-150bp                 | agctgtgtttctttgtagaactga     |
|                                | 151-173bp                 | ccagcagtaaagtctccagttgt      |
|                                | 174-199bp                 | aattccattcaaaatcatctgtaaat   |
|                                | 200-225bp                 | gtgagttgggattcttgtaattatt    |
|                                | 226-251bp                 | tgtaaaacttaaatgtgagcatcctg   |
|                                | 252-269bp                 | ctgtggccttcttgggca           |
|                                | 270-297bp                 | tcttctagacactgaagatgttcagtt  |
|                                | 298-320bp                 | cttctccagaggttgagttct        |
|                                | 321-344bp                 | tttgtcttgagctaaatttagca      |
|                                | 345-367bp                 | gtccctgggtcttaagtgaagat      |
|                                | 368-395bp                 | gaactattacgttgatattgctgattaa |
|                                | 396-419bp                 | ttgttcagatccctttagttcca      |
|                                | 420-444bp                 | tcatcagcatattcacatgaatg      |
|                                | 445-469bp                 | cagaaattctacaatgggtgctgtc    |
|                                | 470-494bp                 | ttgacaaaaggtaatccatctgtt     |
| 495-519bp                      | tatcaagtcagttgagatgatgc   |                              |
| 520-544bp                      | atgttttaagtgggaagcacttaat |                              |

## Human IFN-gamma (NM\_000619)

|             |                                        |
|-------------|----------------------------------------|
| 545-572bp   | aaatatttaataaataagaaggcctgat           |
| 573-601bp   | ccatacattcaacaataataaaaattt            |
| 632-662bp   | tcataaaagatccatatttatagtttaaga         |
| 663-684bp   | cccctagggcttacaaaaagaa                 |
| 685-712bp   | gggataaataagtgaaccattttagag            |
| 26-53bp     | ttaactgatctttctcttaatagctg             |
| 54-75bp     | aagctgatcaggctcaaaggac                 |
| 76-104bp    | aagaagttgaaatcagtagttctgtatc           |
| 105-126bp   | cgttccgagagaattaagcca                  |
| 127-155bp   | aaagccaagataataactgtatatttcat          |
| 156-175bp   | ccaaaacgatgcagagctga                   |
| 176-197bp   | tggcagtaacagccaagagaac                 |
| 198-221bp   | tctgcttctttacatatgggtcc                |
| 222-248bp   | cctgcattaaaatatttctaaggttt             |
| 249-272bp   | ccattatccgctacatctgaatga               |
| 273-297bp   | cttcaaaatgcctaagaaaagagtt              |
| 298-321bp   | tctgtcactctcctttccaatt                 |
| 322-345bp   | gacaatttggctctgcattatfff               |
| 346-372bp   | gtttttaaaaagtttgaagtaaaagga            |
| 373-395bp   | tggatgctctggctcatctttaa                |
| 396-418bp   | ccttgatggctccacactcttt                 |
| 419-444bp   | attgaaaaacttgacattcatgtctt             |
| 445-467bp   | tcatctcgtttcttttgggtct                 |
| 468-492bp   | cgaataattagtcagcttttcgaag              |
| 493-516bp   | gcgttggacattcaagtcagttac               |
| 517-540bp   | ttggatgagttcatgtattgcttt               |
| 541-560bp   | ggcgacagttcagccatcac                   |
| 561-581bp   | cgcttccctgttttagctgct                  |
| 582-605bp   | cgaaacagcatctgactccttttt               |
| 606-626bp   | tactgggatgctcttcgacct                  |
| 627-646bp   | attgcaggcaggacaacat                    |
| 647-678bp   | ttaataaatagatttagatttaaaattcaat        |
| 768-805bp   | atataggaattataaataatacatatattaatagatat |
| 806-830bp   | aaggattaagtgagacagtcacagg              |
| 831-855bp   | gccttgcctaattagtcagaaaaca              |
| 856-882bp   | cctgagataaagccttgaatcacata             |
| 883-901bp   | gttggctgcctagttggcc                    |
| 902-923bp   | caacccatgggatcttgcttag                 |
| 924-951bp   | cattgtatcatcaagtgaataaacaca            |
| 952-981bp   | ctggatagtatcacttcaactataagtgtt         |
| 982-1004bp  | gcatattttcaaaccggcagtaa                |
| 1005-1025bp | aagcactggctcagattgcag                  |
| 1026-1049bp | caagttctgtctgacatgccatta               |
| 1050-1071bp | catcagggtcacctgacacatt                 |
| 1072-1096bp | gaaatctcctgagatgctatgtttt              |
| 1097-1117bp | atatttggaaagcaccaggcat                 |
| 1118-1141bp | tgggtacagtcacagttgtcaaca               |
| 1142-1168bp | atttaacaaatgagttactttccatt             |



|                       |                       |                              |
|-----------------------|-----------------------|------------------------------|
| Human IDO (NM_002164) | 116-135bp             | gtttccatagcgtgtgcca          |
|                       | 136-160bp             | ggtactctttactgattgtccagga    |
|                       | 161-184bp             | caaagcccacttcttcatcaatat     |
|                       | 185-205bp             | tttctgtggatttggcagag         |
|                       | 206-232bp             | tccagtcattataaaaaatcaggtagat |
|                       | 233-255bp             | aggcagatgttttagcaatgaaca     |
|                       | 256-278bp             | agctggccagactctatgagatc      |
|                       | 279-304bp             | tgtttaacttctcaactctttctcga   |
|                       | 305-327bp             | tgtgagatgatcaatgctgagca      |
|                       | 328-347bp             | aggcgctgtgacttgtggtc         |
|                       | 348-369bp             | gcatcccagaactagacgtgca       |
|                       | 370-391bp             | cccacacatatgccatggtgat       |
|                       | 392-412bp             | ggacatctccatgacctttgc        |
|                       | 413-437bp             | gcaatatttcttggcaagaccttac    |
|                       | 438-460bp             | tggagagttggcagtaaggaaca      |
|                       | 461-483bp             | aataggaggcagttccagtttct      |
|                       | 484-507bp             | caagacacagtctgcataaaccaa     |
|                       | 508-530bp             | ggatccttttctccagtttgc        |
|                       | 531-555bp             | gttctcataagtcaggggcttatta    |
|                       | 556-578bp             | cgaaatgagaacaaaacgtccat      |
|                       | 579-602bp             | aatcctttactgcagtctccatca     |
|                       | 603-625bp             | ccaccaatagagagaccaggaag      |
|                       | 626-647bp             | attgcagaagcagctgctattt       |
|                       | 648-674bp             | gccttgaatacagtaggaattactttg  |
|                       | 675-694bp             | cccgttcttgcatgttcatt         |
|                       | 695-715bp             | acagcgcttagcaaagtgt          |
|                       | 716-737bp             | tccaagcaagaagctatttcca       |
|                       | 738-760bp             | ggtgaaacactgaagggtttc        |
|                       | 761-782bp             | gggttcacatgatcgtggattt       |
|                       | 783-806bp             | cgaagaacactgaaaaatgctttt     |
|                       | 807-830bp             | cctttccagccagacaaatatatg     |
|                       | 831-850bp             | cgtctgatagctgggggttg         |
|                       | 851-873bp             | ccagaacccttcataaccagac       |
|                       | 874-894bp             | tgcaaaactccttgggtcttc        |
|                       | 895-910bp             | ggcctgcactgcccc              |
|                       | 950-969bp             | tccaccagcagtctgctgga         |
|                       | 970-990bp             | gaggaactgagcagcatgtcc        |
|                       | 991-1014bp            | tggcatatatcttctcatgtcctg     |
|                       | 1015-1035bp           | caggaagttcctgtgagctgg        |
|                       | 1036-1059bp           | tgagggatttactctaagagca       |
|                       | 1060-1081bp           | ttgaaaggacaaactcacggac       |
| 1082-1099bp           | gcaggccagcatcacctt    |                              |
| 1100-1119bp           | acaggcgtcataagcttccc  |                              |
| 1120-1141bp           | tcaggagaccagagctttcac |                              |
|                       | 213-232bp             | ggtaccacgcgaatcactc          |
|                       | 233-250bp             | agcaagctggctcttgcg           |
|                       | 251-271bp             | cacactgtccgtctgtatgcg        |
|                       | 272-292bp             | cgaggcttcaatgttccac          |

## Human HMBS (NM\_000190)

|             |                           |
|-------------|---------------------------|
| 293-312bp   | tcaaactgcaggccagggtgta    |
| 313-335bp   | ctgtggtggacatagcaatgatt   |
| 336-358bp   | tgcagtatcaagaatcttgtccc   |
| 359-383bp   | ggcttttctctccaatcttagagag |
| 384-406bp   | atgttcaagctccttggtaaaca   |
| 407-428bp   | ccacttcattcttccagggc      |
| 429-451bp   | cttcaaggagtgaacaaccaggt   |
| 452-471bp   | ggaagcacagtgggcaggtc      |
| 472-490bp   | tccgatggtgaagccagga       |
| 491-507bp   | tcccgcttgcatggtc          |
| 508-529bp   | gacaacagcatcatgagggttt    |
| 530-550bp   | cccaacaattttgggtgaaa      |
| 551-571bp   | tggcagggtttctagggtctt     |
| 572-593bp   | tggttccaccacacttctc       |
| 594-612bp   | gctgctcttcgagggagc        |
| 613-633bp   | gggaactttctctgcagctgg     |
| 634-657bp   | cgaatactctgaaactccagatgc  |
| 658-676bp   | ccgggtgttgaggttccc        |
| 677-695bp   | gctcgtccagcttccgaag       |
| 696-716bp   | tgatggcactgaactcctgct     |
| 751-766bp   | ccccaccggttgtgc           |
| 767-786bp   | tcctcagggtgcaggatctg      |
| 787-806bp   | ggcccacagcatacatgcat      |
| 807-821bp   | cgccaaggccccct            |
| 822-839bp   | ccttggtcgcacttcca         |
| 840-861bp   | accagatccaagatgtcctggt    |
| 862-879bp   | ggatcgtgcagcacacc         |
| 880-899bp   | tgacgcaagcagagtctcg       |
| 900-917bp   | ggaaggcccttcagcga         |
| 918-936bp   | cctcctccaggtgcctca        |
| 937-956bp   | cggctactggcacactgcag      |
| 957-979bp   | ccatccttcatagctgtatgca    |
| 980-1003bp  | gactcctccagtcaggtacagttg  |
| 1004-1027bp | gctatctgagccgtctagactcca  |
| 1028-1051bp | ggtagcctgcatggtctctgtat   |
| 1052-1070bp | gctgggcaggacatggat        |
| 1071-1091bp | catcctcaggccatcttcat      |
| 1092-1112bp | tgatgcctaccaactgtgggt     |
| 1113-1134bp | cctcgtggaatgttacgagcag    |
| 1135-1150bp | ggcagccaactggggc          |
| 1151-1170bp | aggctgatgcccaagtctg       |
| 1171-1190bp | tgctcagcaacaagtggcc       |
| 1191-1211bp | ccaggatgttttggctcctt      |
| 1212-1231bp | gtaagctgccgtgaacat        |
| 1232-1253bp | cacaaaccagttaatgggcatc    |
| 1293-1308bp | gcactgaggcccggga          |
| 1309-1330bp | cccagatagcagtgagaatggg    |
| 1331-1351bp | agtctcccgggtaactcctc      |

|                        |                    |                          |
|------------------------|--------------------|--------------------------|
|                        | 1352-1371bp        | aggctgaaccctgcagttc      |
|                        | 1372-1390bp        | ggtgaggcaaatccctgga      |
| Human PPIB (NM_000942) | 97-113bp           | cggtagctagggagccg        |
|                        | 114-130bp          | ggaagaggggtggggccg       |
|                        | 131-147bp          | cccggacagctgaggcc        |
|                        | 148-164bp          | ggcggaggcgaaagcag        |
|                        | 165-182bp          | agaggcgagcatccaca        |
|                        | 183-202bp          | caccttcatgttgcgttcgg     |
|                        | 203-217bp          | ggcggcggcaaggag          |
|                        | 218-233bp          | cggaccccgcgatgag         |
|                        | 234-252bp          | ggcagcagcaggaagaaga      |
|                        | 253-269bp          | cggccgcagaaggctcc        |
|                        | 270-289bp          | gggcccttcttcttctcat      |
|                        | 290-313bp          | aaaatacaccttgacggtgacttt |
|                        | 314-337bp          | atcttcatctccaattcgtagtc  |
|                        | 338-357bp          | caaagatcaccggcctac       |
|                        | 358-379bp          | tggaacagtcttccgaagaga    |
|                        | 380-403bp          | ggccacaaaattatccactgtttt |
|                        | 404-428bp          | caaatccttctctctgtagctaa  |
|                        | 429-451bp          | atggaattgctgtttttagc     |
|                        | 452-476bp          | ggatcatgaagtccttgattacag |
|                        | 477-495bp          | ctggtgaagtctcgcctc       |
|                        | 496-514bp          | tcctcctgtgccatctccc      |
|                        | 515-535bp          | gcgctcaccgtagatgctctt    |
|                        | 536-556bp          | tttgaagtctcatcggggaa     |
|                        | 557-576bp          | ccaggcccgtagtgttcag      |
|                        | 577-594bp          | ttggccatgctcaccag        |
|                        | 595-613bp          | gttggtgtcttgcctgcg       |
|                        | 614-634bp          | cgtgatgaagaactgggagcc    |
|                        | 635-657bp          | tctagccaggctgtctgactgt   |
|                        | 658-677bp          | caaacaccacatgcttgcca     |
|                        | 678-698bp          | ccatgcccttagaactttgc     |
|                        | 699-716bp          | ccacctccgaccacct         |
|                        | 717-737bp          | ggctgtctgtcttgggtctct    |
|                        | 738-758bp          | catcctcaggggttatccc      |
|                        | 759-777bp          | ccgcagtctgcgatgatca      |
|                        | 778-798bp          | ggcttctccacctgatcttg     |
|                        | 799-816bp          | tccttggcgtggcaaag        |
|                        | 817-838bp          | gaaagatgtccctgtgccctac   |
|                        | 839-859bp          | ctgcacagacggtcactcaaa    |
|                        | 860-878bp          | ctgtggcggactacagggc      |
|                        | 879-897bp          | gccagtgcagctcagagcc      |
| 898-914bp              | cagatgccagcaccggg  |                          |
| 915-932bp              | ggagtgggtccgctccac |                          |
|                        | 63-80bp            | gctggcgacgaaaagaa        |
|                        | 81-100bp           | tgtctgagcgtatgggtcgcg    |
|                        | 101-120bp          | gacctcacctccccatgg       |
|                        | 121-140bp          | cgaccaaatccgttgactcc     |

## Human GAPDH (NM\_002046)

|                         |                            |              |
|-------------------------|----------------------------|--------------|
| 141-158bp               | gtgaccaggcgccaata          |              |
| 159-179bp               | ccagagttaaaagcagccctg      |              |
| 180-203bp               | ttgatggcaacaatatccacttta   |              |
| 204-224bp               | ttgaggtcaatgaaggggtca      |              |
| 225-250bp               | catattggaacatgtaaaccatgtag |              |
| 251-270bp               | gaattgccatgggtggaat        |              |
| 271-289bp               | cagccttgacggtgccatg        |              |
| 290-310bp               | tgatgacaagcttcccgttct      |              |
| 311-332bp               | aagatggatgagggattccat      |              |
| 333-351bp               | ggagggatctcgctcctgg        |              |
| 352-371bp               | gcatcgccccacttgatattt      |              |
| 372-390bp               | cacgacgtactcagcgcca        |              |
| 391-411bp               | ggtgaagacgccagtggactc      |              |
| 472-489bp               | gggggcatcagcagaggg         |              |
| 490-511bp               | ggttcacacccatgacgaacat     |              |
| 512-536bp               | ttgaggctgtgtcatacttctcat   |              |
| 537-557bp               | caggaggcattgctgatgac       |              |
| 558-578bp               | ggtgctaagcagttgggtgtg      |              |
| 579-597bp               | atggatgaccttggccagg        |              |
| 598-620bp               | cctccacgataccaaagtgtc      |              |
| 621-642bp               | ggcatggactgtggtcatgagt     |              |
| 643-664bp               | cagtcttctgggtggcagtgat     |              |
| 738-754bp               | ccacagccttggcagcg          |              |
| 755-774bp               | cagctcagggatgaccttgc       |              |
| 775-793bp               | tgccagtgagcttcccgtt        |              |
| 794-810bp               | ggggacacggaaggcca          |              |
| 811-831bp               | caccactgacagcttggcagt      |              |
| 832-852bp               | ttctagacggcaggtcaggtc      |              |
| 853-876bp               | gatgtcatcatatttggcaggttt   |              |
| 913-931bp               | tgtagcccaggatgccctt        |              |
| 932-951bp               | ggagaccactggtgctcag        |              |
| 952-973bp               | gggtgtcgctgttgaagtcaga     |              |
| 974-994bp               | cagcgtcaaaggtggaggagt      |              |
| 995-1011bp              | gagggcaatgccagccc          |              |
| 1012-1033bp             | tgagcttgacaaagtggtcgtt     |              |
| 1034-1056bp             | aaattcgttgcataccaggaaa     |              |
| 1057-1076bp             | accaccctgttgctgtagcc       |              |
| 1117-1133bp             | ctggggctggtggtcca          |              |
| 1134-1157bp             | ctctcttctcttctgtctcttg     |              |
| 1158-1177bp             | gactccccagcagtgagggt       |              |
| hsa-miR-21 (MI0000077)  | 8-18bp                     | ctgataagcta  |
|                         | 19-29bp                    | tcaacatcagt  |
| hsa-miR-155 (MI0000681) | 4-15bp                     | gattagcattaa |
|                         | 16-26bp                    | accctatcac   |
